# Supplementary material for: CAVE: Connectome Annotation Versioning Engine
Source: PubMed Central journal article supplement — bioRxiv. 2023 Jul 28:2023.07.26.550598. Preprint. [Version 1] doi: 10.1101/2023.07.26.550598 (PMC10402030; doi:10.1101/2023.07.26.550598), 2023-07-28
Supplement: NIHPP2023.07.26.550598v1-supplement-1.pdf [file NIHPP2023.07.26.550598v1-supplement-1.pdf]

## CAVE related packages

| Package                | Description                                | github                                                                                                                                                                                           |
|------------------------|--------------------------------------------|--------------------------------------------------------------------------------------------------------------------------------------------------------------------------------------------------|
| CAVEdeployment         | Kubernetes deployment scripts              | <a href="https://github.com/seung-lab/CAVEdeployment">https://github.com/seung-lab/CAVEdeployment</a>                                                                                            |
| ChunkedGraph           | Proofreading & Meshing service             | <a href="https://github.com/seung-lab/PyChunkedGraph">https://github.com/seung-lab/PyChunkedGraph</a>                                                                                            |
| AnnotationEngine       | Annotation service                         | <a href="https://github.com/seung-lab/AnnotationEngine">https://github.com/seung-lab/AnnotationEngine</a>                                                                                        |
| AnnotationDB           | Annotation storage                         | <a href="https://github.com/seung-lab/DynamicAnnotationDB">https://github.com/seung-lab/DynamicAnnotationDB</a>                                                                                  |
| Materialization        | Materialization service                    | <a href="https://github.com/seung-lab/MaterializationEngine">https://github.com/seung-lab/MaterializationEngine</a>                                                                              |
| EMAnnotationSchemas    | Annotation schemas                         | <a href="https://github.com/seung-lab/EMAnnotationSchemas">https://github.com/seung-lab/EMAnnotationSchemas</a>                                                                                  |
| MiddleAuth             | Auth service                               | <a href="https://github.com/seung-lab/middle_auth">https://github.com/seung-lab/middle_auth</a>                                                                                                  |
| MiddleAuth Client      | Client interface for the auth service      | <a href="https://github.com/seung-lab/middle_auth_client">https://github.com/seung-lab/middle_auth_client</a>                                                                                    |
| Info                   | Info service                               | <a href="https://github.com/seung-lab/AnnotationFrameworkInfoService">https://github.com/seung-lab/AnnotationFrameworkInfoService</a>                                                            |
| StateServer            | Neuroglancer state storage                 | <a href="https://github.com/seung-lab/NeuroglancerJsonServer">https://github.com/seung-lab/NeuroglancerJsonServer</a>                                                                            |
| L2Cache                | ChunkedGraph cache                         | <a href="https://github.com/seung-lab/PCGL2Cache">https://github.com/seung-lab/PCGL2Cache</a>                                                                                                    |
| Guidebook              | Proofreading guidance                      | <a href="https://github.com/AllenInstitute/Guidebook">https://github.com/AllenInstitute/Guidebook</a>                                                                                            |
| ProofreadingManagement | Proofreading management                    | <a href="https://github.com/seung-lab/ProofreadingManagement">https://github.com/seung-lab/ProofreadingManagement</a>                                                                            |
| DashOnFlask            | Dash app deployment                        | <a href="https://github.com/AllenInstitute/dash_on_flask">https://github.com/AllenInstitute/dash_on_flask</a>                                                                                    |
| CAVEcanary             | Error detection and notification system    | <a href="https://github.com/AllenInstitute/CAVEcanary">https://github.com/AllenInstitute/CAVEcanary</a>                                                                                          |
| datastoreflex          | Hybrid Datastore and GCS interface         | <a href="https://github.com/seung-lab/datastore-flex">https://github.com/seung-lab/datastore-flex</a>                                                                                            |
| MeshParty              | Mesh python client                         | <a href="https://github.com/sdorkenw/MeshParty">https://github.com/sdorkenw/MeshParty</a>                                                                                                        |
| cloudvolume            | Image and mesh interface                   | <a href="https://github.com/seung-lab/cloud-volume">https://github.com/seung-lab/cloud-volume</a>                                                                                                |
| cloudfiles             | Storage interface                          | <a href="https://github.com/seung-lab/cloud-files">https://github.com/seung-lab/cloud-files</a>                                                                                                  |
| pcg_skel               | ChunkedGraph-based skeletonization         | <a href="https://github.com/AllenInstitute/pcg_skel">https://github.com/AllenInstitute/pcg_skel</a>                                                                                              |
| NGLAnnotationUI        | Create ngl states programmatically         | <a href="https://github.com/seung-lab/NeuroglancerAnnotationUI">https://github.com/seung-lab/NeuroglancerAnnotationUI</a>                                                                        |
| neuroglancer           | Interactive UI for image and mesh data     | <a href="https://github.com/seung-lab/neuroglancer">https://github.com/seung-lab/neuroglancer</a><br><a href="https://github.com/google/neuroglancer">https://github.com/google/neuroglancer</a> |
| ngextend               | Neuroglancer wrapper to add customizations | <a href="https://github.com/seung-lab/ng-extend">https://github.com/seung-lab/ng-extend</a>                                                                                                      |

**Supplemental Table 1: Overview of CAVE package**
